# Supplementary material for: Proteolytic disassembly of peptide-mediated graphene oxide assemblies for turn-on fluorescence sensing of proteases
Source: Royal Society of Chemistry journal article supplement (doi:10.1039/c6nr02815b), 2016-01-01
Supplement: c6nr02815b1.pdf [file c6nr02815b1.pdf]

## Supporting Information

### Proteolytic Disassembly of Peptide-mediated Graphene Oxide Assemblies for Turn-on Fluorescence Sensing of Proteases

Jin-Kyoung Yang<sup>†,‡</sup>, Seon-Yeong Kwak<sup>†,§,||</sup>, Su-Ji Jeon<sup>§</sup>, Eunjin Lee<sup>‡</sup>, Jong-Min Ju<sup>§</sup>, Hye-In Kim<sup>§</sup>, Yoon-Sik Lee<sup>\*,‡</sup>, and Jong-Ho Kim<sup>\*,§</sup>

<sup>‡</sup>School of Chemical and Biological Engineering, Seoul National University, Seoul 141-742, Republic of Korea

<sup>§</sup>Department of Chemical Engineering, Hanyang University, Ansan 426-791, Republic of Korea

<sup>||</sup>Current address: Department of Chemical Engineering, Massachusetts Institute of Technology, Massachusetts 02139, United States

\*To whom correspondence should be addressed: Jong-Ho Kim ([kjh75@hanyang.ac.kr](mailto:kjh75@hanyang.ac.kr)), Yoon-Sik Lee ([yslee@snu.ac.kr](mailto:yslee@snu.ac.kr))

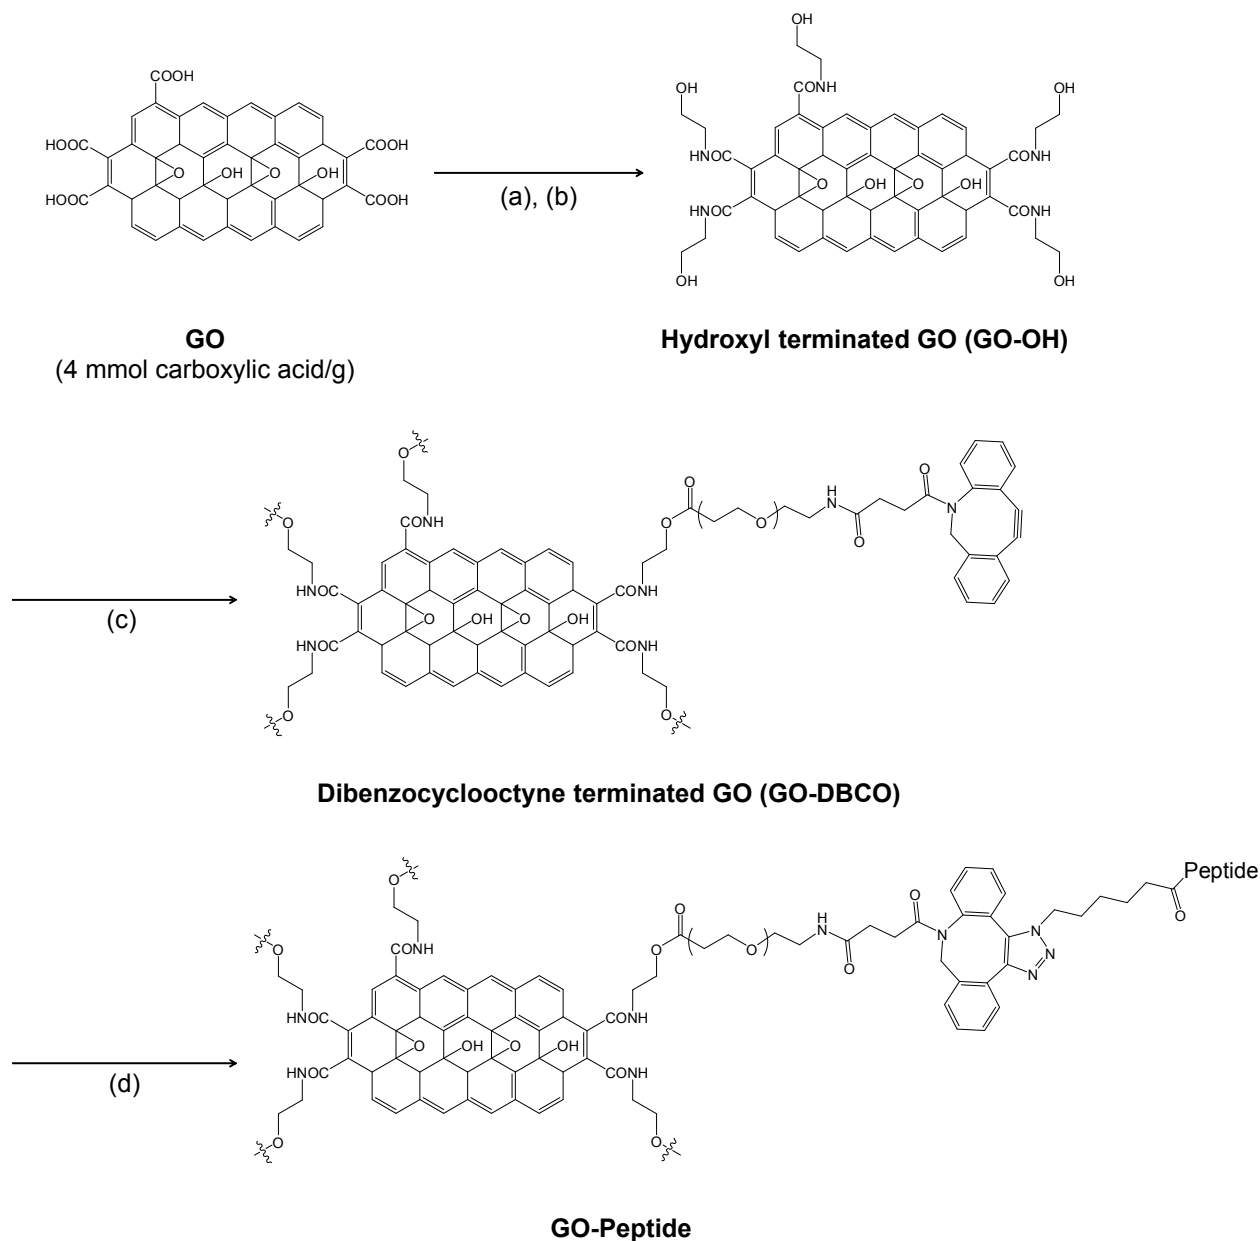

**Scheme S1.** Synthesis of GO-peptide hybrids (GO-P): (a) EDC (20 equiv) and NHS (20 equiv) in 50 mM PBS (pH 6.0) for 0.5 h; (b) ethanolamine (40 equiv) for 3 h; (c) preactivated DBCO-PEG-acid (2 equiv) and DMAP (0.1 equiv) in DMF for 6 h; (d) N<sub>3</sub>-peptide (1 equiv) in PBS (50 mM, pH 7.0) for 2 h.

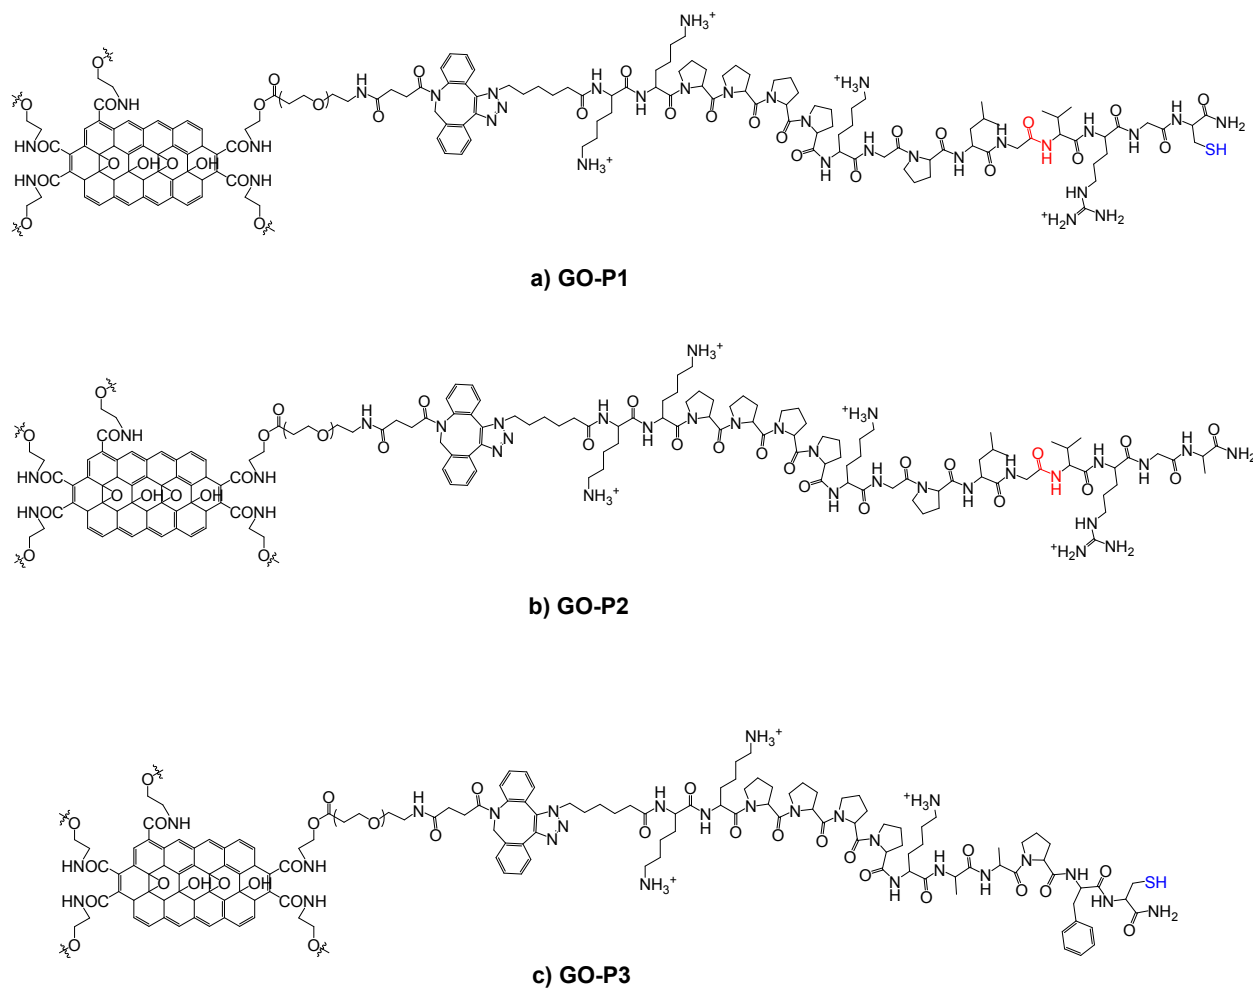

**Figure S1.** Chemical structures of GO-P hybrids. (a) GO-P1 for specific optical detection of MMP-2, containing two functional sites: MMP-2–cleavable substrate (cleavage site, red) and disulfide bridging site (blue). (b, c) negative control sensors: (b) GO-P2 containing MMP-2–cleavable site without a thiol group, (c) GO-P3 containing non-specific peptide sequence for MMP-2 with a thiol group.

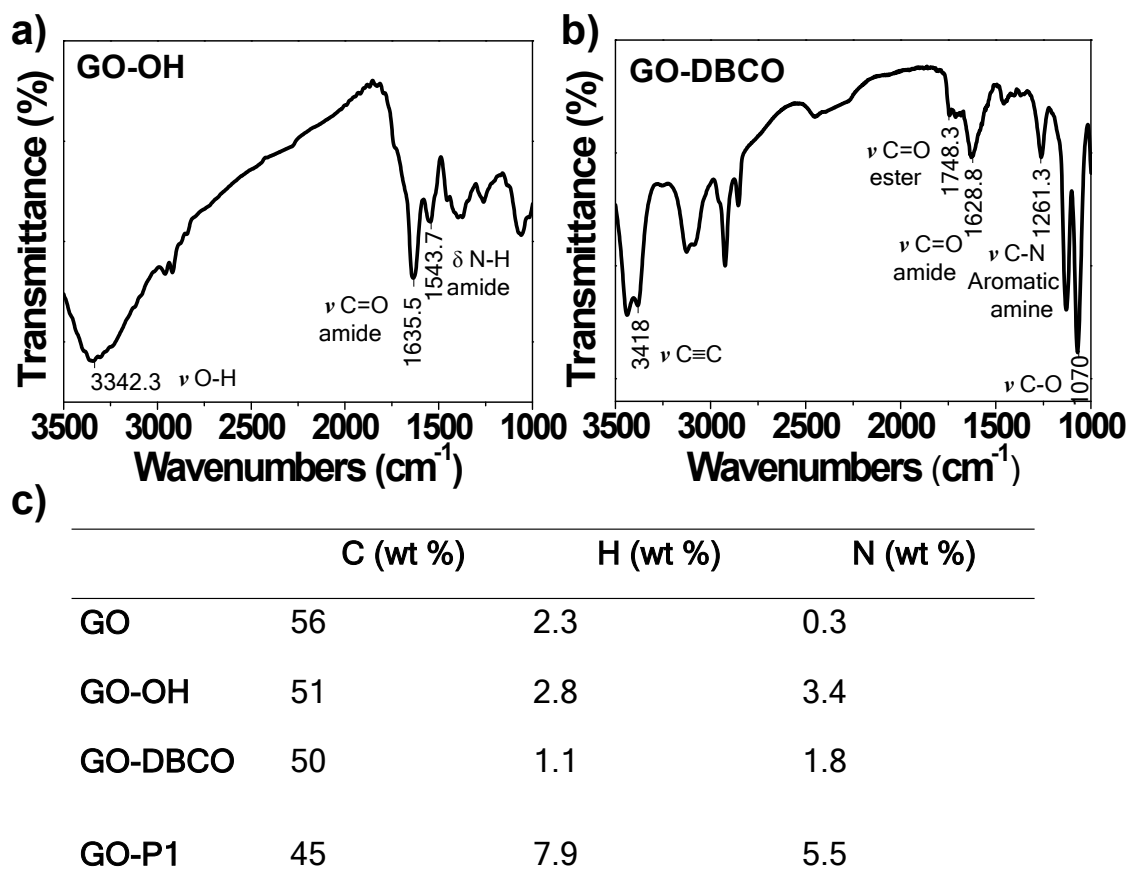

**Figure S2.** Characterization of functionalized GO. FT-IR (KBr) spectra of (a) GO-OH, and (b) GO-DBCO. (c) Elemental analysis of GO, GO-OH, GO-DBCO, and GO-P1.

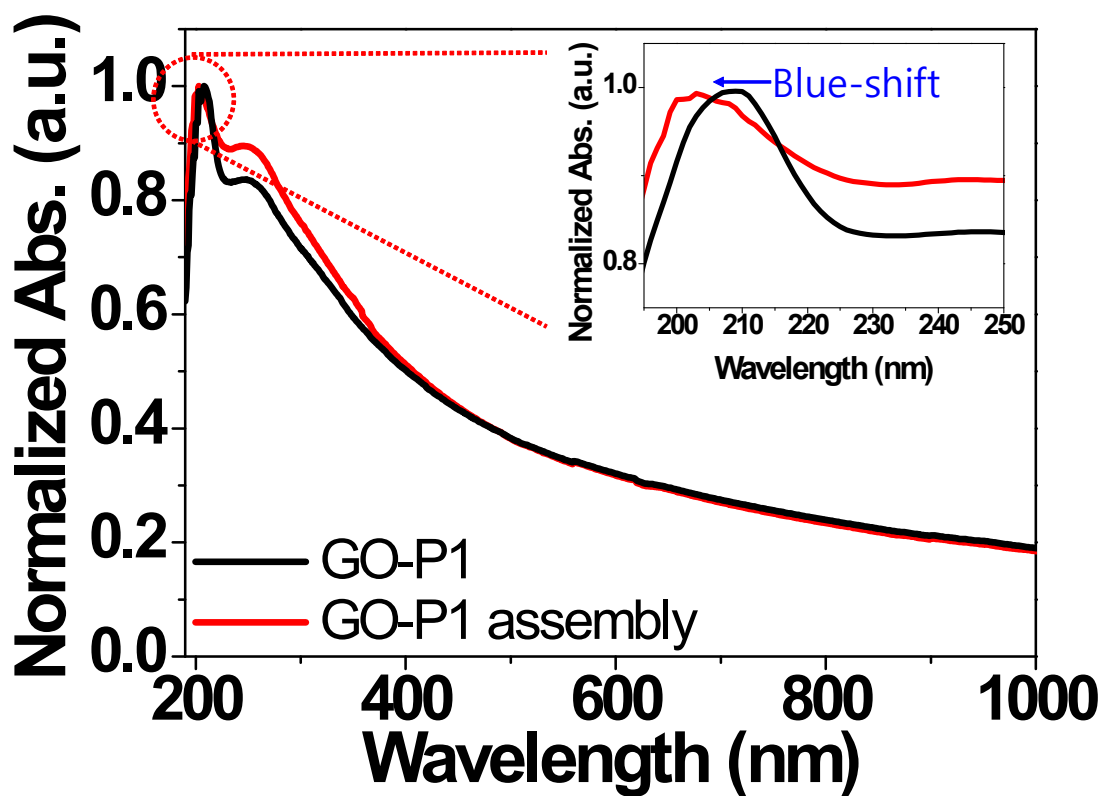

*Figure S3.* UV/Vis absorption spectra of GO-P1 (black line, 0.1 mg/mL), and GO-P1 assembly (red line, 0.1 mg/mL), showing absorption maxima at 210 and 203 nm, respectively.

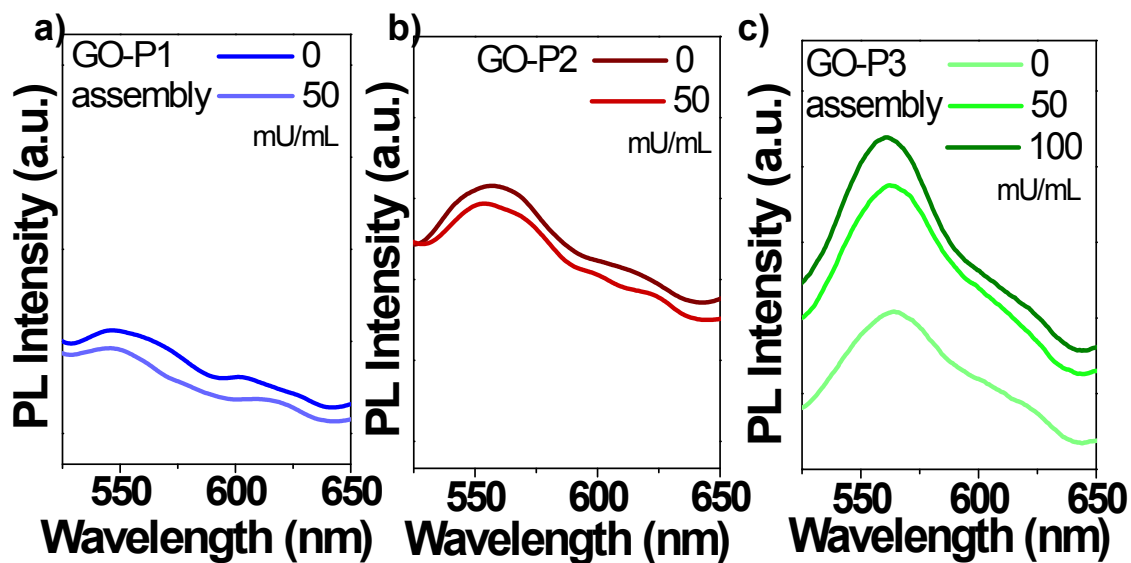

**Figure S4.** Fluorescence responses of (a) GO-P1 assembly, (b) GO-P2, and (c) GO-P3 assembly in the presence of chymotrypsin. Fluorescence recovery was observed only for the GO-P3 assembly containing the chymotrypsin substrate peptide. All spectra were obtained under excitation at 400 nm.

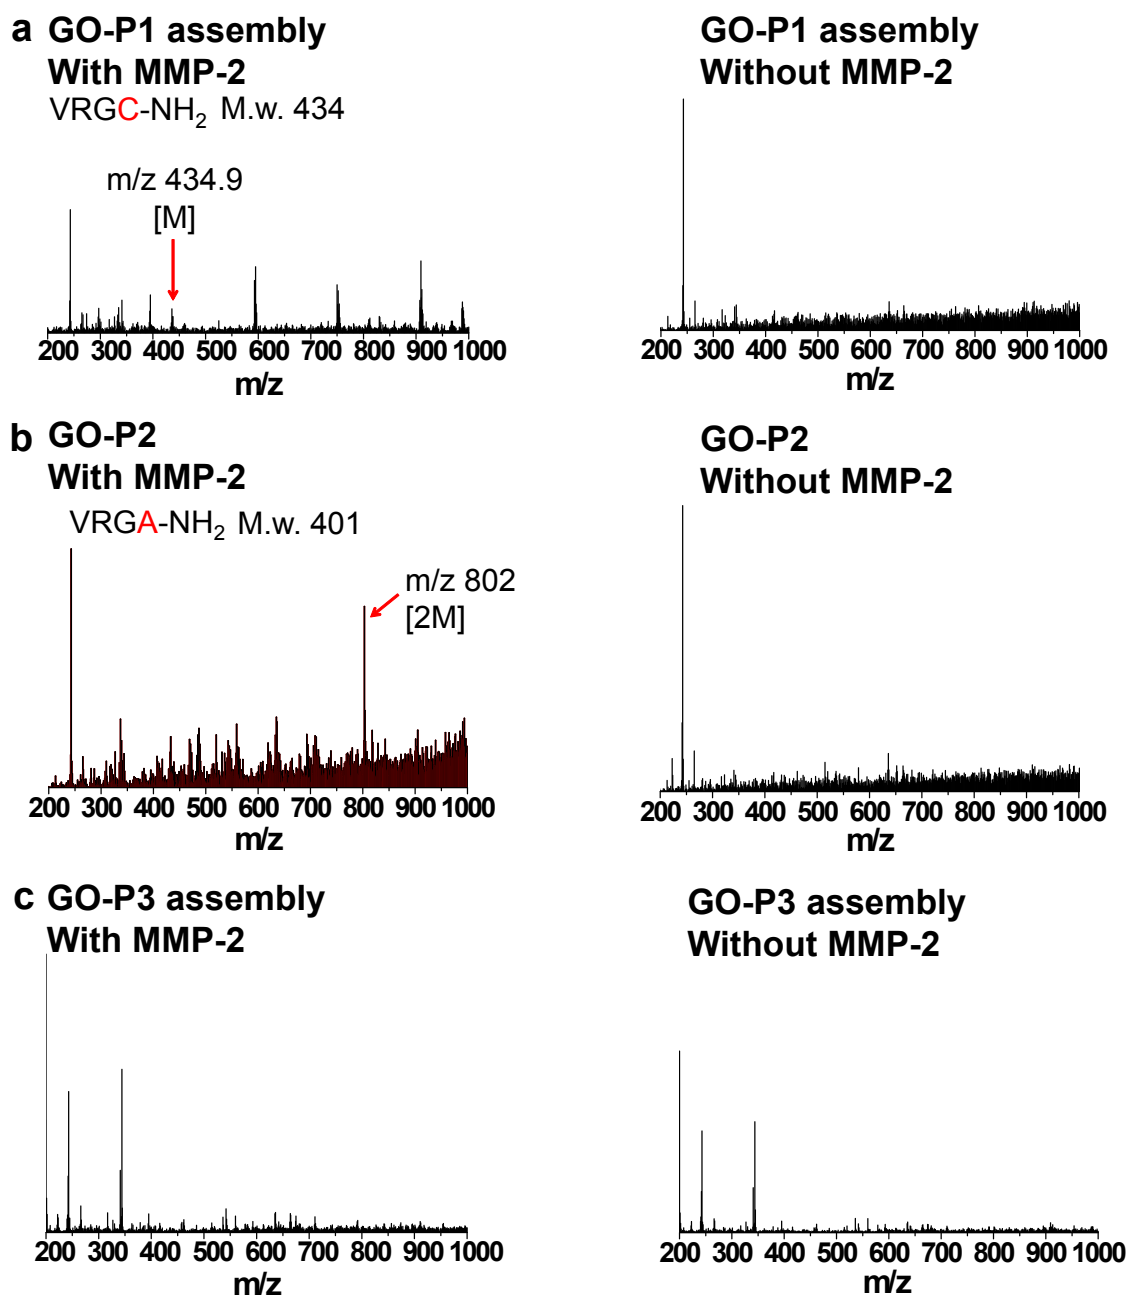

**Figure S5.** Mass spectrometric analysis of proteolytic cleavage of the peptide substrates on several GO-Peptide sensor by MMP-2. MS spectrum of (a) GO-P1 assembly, (b) GO-P2, and (c) GO-P3 assembly with (left panels) or without (right panels) MMP-2, MMP-2 was treated for 2 h at 37 °C. The sequences cleaved from the GO-P1 assembly and from GO-P2 by MMP-2 were VRGC-NH<sub>2</sub> and VRGA-NH<sub>2</sub>, respectively.
